# Supplementary material
Source: PubMed Central journal article supplement (PMC9892200)
Supplement: NIHMS1839898-supplement-Supplemental_Digital_Content_1.pdf [file NIHMS1839898-supplement-Supplemental_Digital_Content_1.pdf]

### Appendix 1.

Table A1. Characteristics of participants who completed the survey compared to those who left survey incomplete

| Characteristic                       | Complete<br>(n=899) | Incomplete<br>(n=87) | p value      |
|--------------------------------------|---------------------|----------------------|--------------|
| <b>Age †</b>                         |                     |                      |              |
| Mean                                 | 32.6 ± 7.06         | 32.4 ± 7.0           | 0.737        |
| Median                               | 33                  | 33                   |              |
| Range                                | 18-45               | 19-45                |              |
| <b>Race</b>                          |                     |                      |              |
| American Indian/Alaska Native        | 17 (1.90%)          | 2 (2.27%)            | <b>0.025</b> |
| Asian                                | 86 (9.60%)          | 3 (3.41%)            |              |
| Black                                | 76 (8.48%)          | 7 (8.95%)            |              |
| Native Hawaiiin/ Pacific Islander    | 2 (0.22%)           | 1 (1.14%)            |              |
| White                                | 680 (75.9%)         | 66 (75.0%)           |              |
| Other                                | 35 (3.91%)          | 9 (10.2%)            |              |
| <b>Ethnicity</b>                     |                     |                      |              |
| Hispanic                             | 122 (13.8%)         | 19 (22.6%)           | <b>0.029</b> |
| Non-Hispanic                         | 761 (86.2%)         | 65 (77.4%)           |              |
| <b>Number of children</b>            |                     |                      |              |
| Mean                                 | 1.12 ± 1.32         | 1.06 ± 1.18          | 0.796        |
| Median                               | 1                   | 1                    |              |
| Range                                | 0-11                | 0-4                  |              |
| <b>Current marital status</b>        |                     |                      |              |
| Single                               | 256 (28.5%)         | 21 (23.9%)           | 0.401        |
| In relationship, but not married     | 179 (20.0%)         | 24 (27.3%)           |              |
| Married                              | 421 (47.0%)         | 40 (45.5%)           |              |
| Divorced/Separated/Widowed/<br>Other | 40 (4.5%)           | 3 (3.4%)             |              |

Anto-Ocrah M, Valachovic T, Chen M, Tiffany K, DeSplinter L, Kaukeinen K, et al. Associations between coronavirus disease 2019 (COVID-19) stress and menstrual changes. *Obstet Gynecol* 2023;141.

The authors provided this information as a supplement to their article.

©2022 American College of Obstetricians and Gynecologists.

| <b>Educational attainment <sup>¥¥ †</sup></b> |             |            |       |
|-----------------------------------------------|-------------|------------|-------|
| Less than or equal to High School             | 310 (34.6%) | 33 (37.9%) | 0.742 |
| Technical/ Associate's/<br>Bachelor's Degree  | 373 (41.6%) | 36 (41.4%) |       |
| Master's or other Advanced<br>Degrees         | 214 (23.9%) | 18 (20.7%) |       |

Table A2. Prevalence of reported menstrual change amongst naturally-cycling participants included in analysis

| Presence of Menstrual Change | Number of Participants<br>(n=374) |
|------------------------------|-----------------------------------|
| <b>Any Menstrual Change</b>  | <b>191</b>                        |
| One parameter                | 66 (34.55%)                       |
| Two parameters               | 41 (21.47%)                       |
| Three parameters             | 61 (31.94%)                       |
| Four parameters              | 23 (12.04%)                       |
| <b>No Menstrual Change</b>   | <b>180</b>                        |
| <b>Missing</b>               | <b>3</b>                          |

We created a composite outcome variable of whether ANY change in any of the following: LENGTH or DURATION or FLOW or SPOTTING. That is, if you have experienced change in at least one of these 4 categories, then you are considered as having experienced change. **191 women experienced some change and 180 did not.** Out of the 191 women who reported *some* change, 34.55% reported only 1 change, 21.5% reported 2 changes, 31.94% reported 3 changes, and **12.04% reported changes in all 4 parameters of their menstrual function.**

Table A3. Comparing participants who indicated no menstrual change to those who reported menstrual changes on key variables, to identify covariates to adjust for in multivariable analyses (note this is amongst naturally cycling women who met 2<sup>nd</sup> set of eligibility criteria)

| Characteristic                                    | No Menstrual Change | Menstrual Change | p value |
|---------------------------------------------------|---------------------|------------------|---------|
| <b>Age (n= 369)<sup>†</sup></b>                   |                     |                  | 0.211   |
| Mean                                              | 33.0 ± 7.3          | 32.0 ± 7.5       |         |
| Median                                            | 34                  | 32               |         |
| Range                                             | 18-45               | 18-45            |         |
| <b>Race (n=370)</b>                               |                     |                  | 0.493   |
| American Indian/Alaska Native                     | 2 (1.1)             | 7 (3.7)          |         |
| Asian                                             | 18 (10.1)           | 14 (7.3)         |         |
| Black/ African American                           | 17 (9.5)            | 22 (11.5)        |         |
| Native Hawaiian/Pacific Islander                  | 1 (0.6)             | 1 (0.5)          |         |
| White                                             | 130 (72.6)          | 139 (72.8)       |         |
| Other                                             | 11 (6.2)            | 8 (4.2)          |         |
| <b>Ethnicity (n=364)</b>                          |                     |                  | 0.507   |
| Hispanic                                          | 22 (12.5)           | 28 (14.9)        |         |
| Non-Hispanic                                      | 154 (87.5)          | 160 (85.1)       |         |
| <b>Number of children (n=345)</b>                 |                     |                  | 0.384   |
| Mean                                              | 0.83 ± 1.1          | 1.0 ± 1.4        |         |
| Median                                            | 0                   | 1                |         |
| Range                                             | 0-4                 | 0-11             |         |
| <b>Current relationship status (n=369)</b>        |                     |                  | 0.241   |
| Single                                            | 65 (36.3)           | 63 (33.2)        |         |
| In relationship, but not married                  | 33 (18.4)           | 52 (27.4)        |         |
| Married                                           | 72 (40.2)           | 67 (35.3)        |         |
| Divorced/Separated/Widowed/<br>Other              | 9 (5.0)             | 8 (4.2)          |         |
| <b>Partner gender (n=180)</b>                     |                     |                  | 0.837   |
| Male partner                                      | 82 (95.4)           | 89 (94.7)        |         |
| Female partner                                    | 4 (4.7)             | 5 (5.3)          |         |
| <b>Educational attainment (n=368)<sup>‡</sup></b> |                     |                  | 0.012   |
| Less than or equal to High School                 | 69 (38.8)           | 94 (49.5)        |         |
| Technical/ Associate's/ Bachelor's<br>Degree      | 73 (41.0)           | 77 (40.5)        |         |
| Master's or other Advanced Degrees                | 36 (20.2)           | 19 (10.0)        |         |
| <b>Smoking Status (n=369)<sup>†</sup></b>         |                     |                  | 0.954   |
| Long term tobacco user, even before<br>pandemic   | 49 (27.4)           | 54 (38.4)        |         |

Anto-Ocrah M, Valachovic T, Chen M, Tiffany K, DeSplinter L, Kaukeinen K, et al. Associations between coronavirus disease 2019 (COVID-19) stress and menstrual changes. *Obstet Gynecol* 2023;141.

The authors provided this information as a supplement to their article.

©2022 American College of Obstetricians and Gynecologists.

Page 4 of 8

|                                                     |            |            |         |
|-----------------------------------------------------|------------|------------|---------|
| Recently started smoking since the pandemic         | 6 (3.4)    | 7 (3.7)    |         |
| Recently stopped smoking                            | 18 (10.1)  | 16 (8.4)   |         |
| Has never used tobacco                              | 106 (59.2) | 113 (49.5) |         |
| <b>Pre-pandemic menstrual functioning (n=365)</b>   |            |            | 0.659   |
| Amenorrhea (0-3 periods/ year)                      | 11 (6.3)   | 16 (8.5)   |         |
| Oligomenorrhea (4-7 periods/ year)                  | 14 (8.0)   | 15 (7.9)   |         |
| Normal cycle (8-14 periods/ year)                   | 142 (80.7) | 144 (76.2) |         |
| Polymenorrhea (15 or more periods/ year)            | 9 (5.1)    | 14 (7.4)   |         |
| <b>COVID-19 vaccination status (n= 367)</b>         |            |            | 0.824   |
| Vaccinated                                          | 63 (35.4)  | 69 (36.5)  |         |
| Not Vaccinated                                      | 115 (64.6) | 120 (63.5) |         |
| <b>Reproductive/gynecologic comorbidity (n=369)</b> |            |            | 0.296   |
| Yes                                                 | 19 (10.6)  | 27 (14.2)  |         |
| No                                                  | 160 (89.4) | 163 (85.8) |         |
| <b>Thyroid comorbidity (n= 369)</b>                 |            |            | 0.384   |
| Yes                                                 | 10 (5.6)   | 7 (3.7)    |         |
| No                                                  | 169 (94.4) | 183 (96.3) |         |
| <b>Obesity Status (n= 369) †</b>                    |            |            | 0.591   |
| Obese                                               | 20 (11.2)  | 18 (9.5)   |         |
| Not obese                                           | 159 (88.8) | 172 (90.5) |         |
| <b>Mental health comorbidity (n= 369) ††</b>        |            |            | <0.0001 |
| Yes                                                 | 56 (31.3)  | 104(54.7)  |         |
| No                                                  | 123 (68.7) | 86 (45.3)  |         |
| <b>Sexually Transmitted Infection (n=369)</b>       |            |            | 0.585   |
| Yes                                                 | 4 (2.2)    | 6 (3.2)    |         |
| No                                                  | 175 (97.8) | 184 (96.8) |         |

Menstrual change refers to at least one reported change in any of the four menstrual parameters: cycle length, period duration, menstrual flow or intermenstrual spotting.

Data are n (%) unless otherwise specified.

\*Reproductive/ gynecologic diagnoses included endometriosis, fibroids/myomas, polycystic ovarian syndrome (PCOS), and uterine polyps

\*\*Mental health diagnoses included anorexia, anxiety, depression and other mood disorders

Anto-Ocrah M, Valachovic T, Chen M, Tiffany K, DeSplinter L, Kaukeinen K, et al. Associations between coronavirus disease 2019 (COVID-19) stress and menstrual changes. *Obstet Gynecol* 2023;141.

The authors provided this information as a supplement to their article.

©2022 American College of Obstetricians and Gynecologists.

Page 5 of 8

Table A4. Select characteristics of excluded non-natural cyclers vs. Included naturally-cycling participants

| Characteristic                            | Excluded (n=569, non-natural cyclers) | Included (n=374, naturally-cycling) | p value |
|-------------------------------------------|---------------------------------------|-------------------------------------|---------|
| <b>Age<sup>‡</sup></b>                    |                                       |                                     |         |
| Mean                                      | 32.6 ± 6.7                            | 32.5 ± 7.4                          | 0.790   |
| Median                                    | 32                                    | 33                                  |         |
| <b>Race</b>                               |                                       |                                     |         |
| Black                                     | 36 (6.9%)                             | 40 (10.7%)                          | 0.076   |
| White                                     | 405 (78.2%)                           | 270 (72.4%)                         |         |
| Other                                     | 77 (14.9%)                            | 63 (16.9%)                          |         |
| <b>Ethnicity</b>                          |                                       |                                     |         |
| Hispanic                                  | 71 (13.9%)                            | 51 (13.8%)                          | 0.960   |
| Non-Hispanic                              | 438 (86.1%)                           | 318 (86.2%)                         |         |
| <b>Current marital status</b>             |                                       |                                     |         |
| Single                                    | 146 (28.1%)                           | 164 (44.0%)                         | <0.001  |
| In relationship, but not married          | 94 (18.1%)                            | 85 (22.7%)                          |         |
| Married                                   | 277 (53.5%)                           | 140 (37.4%)                         |         |
| Divorced/Separated/Widowed/ Other         | 23 (4.4%)                             | 17 (4.5%)                           |         |
| <b>Educational attainment<sup>‡</sup></b> |                                       |                                     |         |
| Less than or equal to High School         | 146 (28.1%)                           | 164 (44.0%)                         | <0.001  |
| Technical/ Associate's/ Bachelor's Degree | 221 (42.6%)                           | 152 (40.8%)                         |         |
| Master's or other Advanced Degrees        | 152 (29.3%)                           | 57 (15.3%)                          |         |
| <b>Smoking Status (n=833)<sup>‡</sup></b> |                                       |                                     |         |

Anto-Ocrah M, Valachovic T, Chen M, Tiffany K, DeSplinter L, Kaukeinen K, et al. Associations between coronavirus disease 2019 (COVID-19) stress and menstrual changes. *Obstet Gynecol* 2023;141.

The authors provided this information as a supplement to their article.

|                                                                                                                |             |             |        |
|----------------------------------------------------------------------------------------------------------------|-------------|-------------|--------|
| Long term tobacco user, even before pandemic                                                                   | 187 (36.7%) | 104 (27.8%) | <0.001 |
| Recently started smoking since the pandemic                                                                    | 55 (10.8%)  | 13 (3.5%)   |        |
| Recently stopped smoking                                                                                       | 52 (10.2%)  | 35 (9.4%)   |        |
| Has never used tobacco                                                                                         | 216 (42.4%) | 222 (59.4%) |        |
| <b>Pre-pandemic menstrual functioning</b><br><i>(Only asked of those not using non-hormonal birth control)</i> |             |             |        |
| Amenorrhea (0-3 periods/year)                                                                                  | 0 (0.0%)    | 28 (7.6%)   | 0.20   |
| Oligomenorrhea (4-7 periods/year)                                                                              | 1 (50.0%)   | 30 (8.1%)   |        |
| Normal cycle (8-14 periods/year)                                                                               | 1 (50.0%)   | 288 (78.0%) |        |
| Polymenorrhea (15 or more periods/year)                                                                        | 0 (0.0%)    | 23 (6.2%)   |        |
| <b>COVID-19 vaccination status</b>                                                                             |             |             |        |
| Vaccinated                                                                                                     | 280 (54.9%) | 134 (36.0%) | <0.001 |
| Not Vaccinated                                                                                                 | 230(45.1%)  | 238 (64.0%) |        |
| <b>Reproductive/gynecologic comorbidity</b>                                                                    |             |             |        |
| Yes                                                                                                            | 134 (23.6%) | 46 (12.3%)  | <0.001 |
| No                                                                                                             | 435 (76.4%) | 328 (87.7%) |        |
| <b>Thyroid comorbidity</b>                                                                                     |             |             |        |
| Yes                                                                                                            | 47 (8.3%)   | 17 (4.5%)   | 0.027  |
| No                                                                                                             | 522 (91.7%) | 357 (95.5%) |        |
| <b>Obesity Status<sup>†</sup></b>                                                                              |             |             |        |
| Obese                                                                                                          | 80 (14.1%)  | 38 (10.2%)  | 0.077  |
| Not obese                                                                                                      | 489 (85.9%) | 336 (89.8%) |        |
| <b>Mental health comorbidity<sup>‡§†**</sup></b>                                                               |             |             |        |

Anto-Ocrah M, Valachovic T, Chen M, Tiffany K, DeSplinter L, Kaukeinen K, et al. Associations between coronavirus disease 2019 (COVID-19) stress and menstrual changes. *Obstet Gynecol* 2023;141.

The authors provided this information as a supplement to their article.

|                                       |             |             |       |
|---------------------------------------|-------------|-------------|-------|
| Yes                                   | 290 (51.0%) | 162 (43.3%) | 0.021 |
| No                                    | 279 (49.0%) | 212 (56.7%) |       |
| <b>Sexually Transmitted Infection</b> |             |             |       |
| Yes                                   | 43 (7.6%)   | 10 (2.7%)   | 0.001 |
| No                                    | 526 (92.4%) | 364 (97.3%) |       |

There were no age, race or ethnicity differences between the groups. However, the excluded participants were more likely to be married ( $p < 0.001$ ), have greater educational attainment ( $p < 0.001$ ), have a history of tobacco use ( $p < 0.001$ ), and not surprisingly, have a history of thyroid ( $p = 0.027$ ) and/or reproductive issues ( $p < 0.001$ ) that may have necessitated gynecological intervention (e.g., hormonal birth control, surgical methods) to control. Of utmost relevance to the study's aims, was the fact that vaccination rates were lower in the natural cyclers than the non-natural cyclers; meaning that menstrual changes reported by the cohort of natural cyclers in our analyses (Tables 3 and 4) was less attributable to the COVID vaccine.
